# Supplementary material
Source: PubMed Central journal article supplement (PMC3087843)
Supplement: NIHMS268283-supplement-1.pdf [file NIHMS268283-supplement-1.pdf]

# Structural Basis For Antigenic Peptide Precursor Processing by the Endoplasmic Reticulum Aminopeptidase ERAP1

Tina T. Nguyen, Shih-Chung Chang, Irimi Evnouchidou, Ian A. York, Christos Zikos,  
Kenneth L. Rock, Alfred L. Goldberg, Efstratios Stratikos, Lawrence J. Stern

## List of Supplementary Materials

**Supplementary Figure 1** ERAP1 trimer and packing in unit cell

**Supplementary Figure 2** Domain Motions

**Supplementary Figure 3** Kinetic parameters for L<sup>Me</sup> activation of L-AMC hydrolysis  
by ERAP1

**Supplementary Figure 4** Electron Density

**Supplementary Table 1** Non-crystallographic symmetry and domain statistics

**Supplementary Movie 1** Normal mode analysis

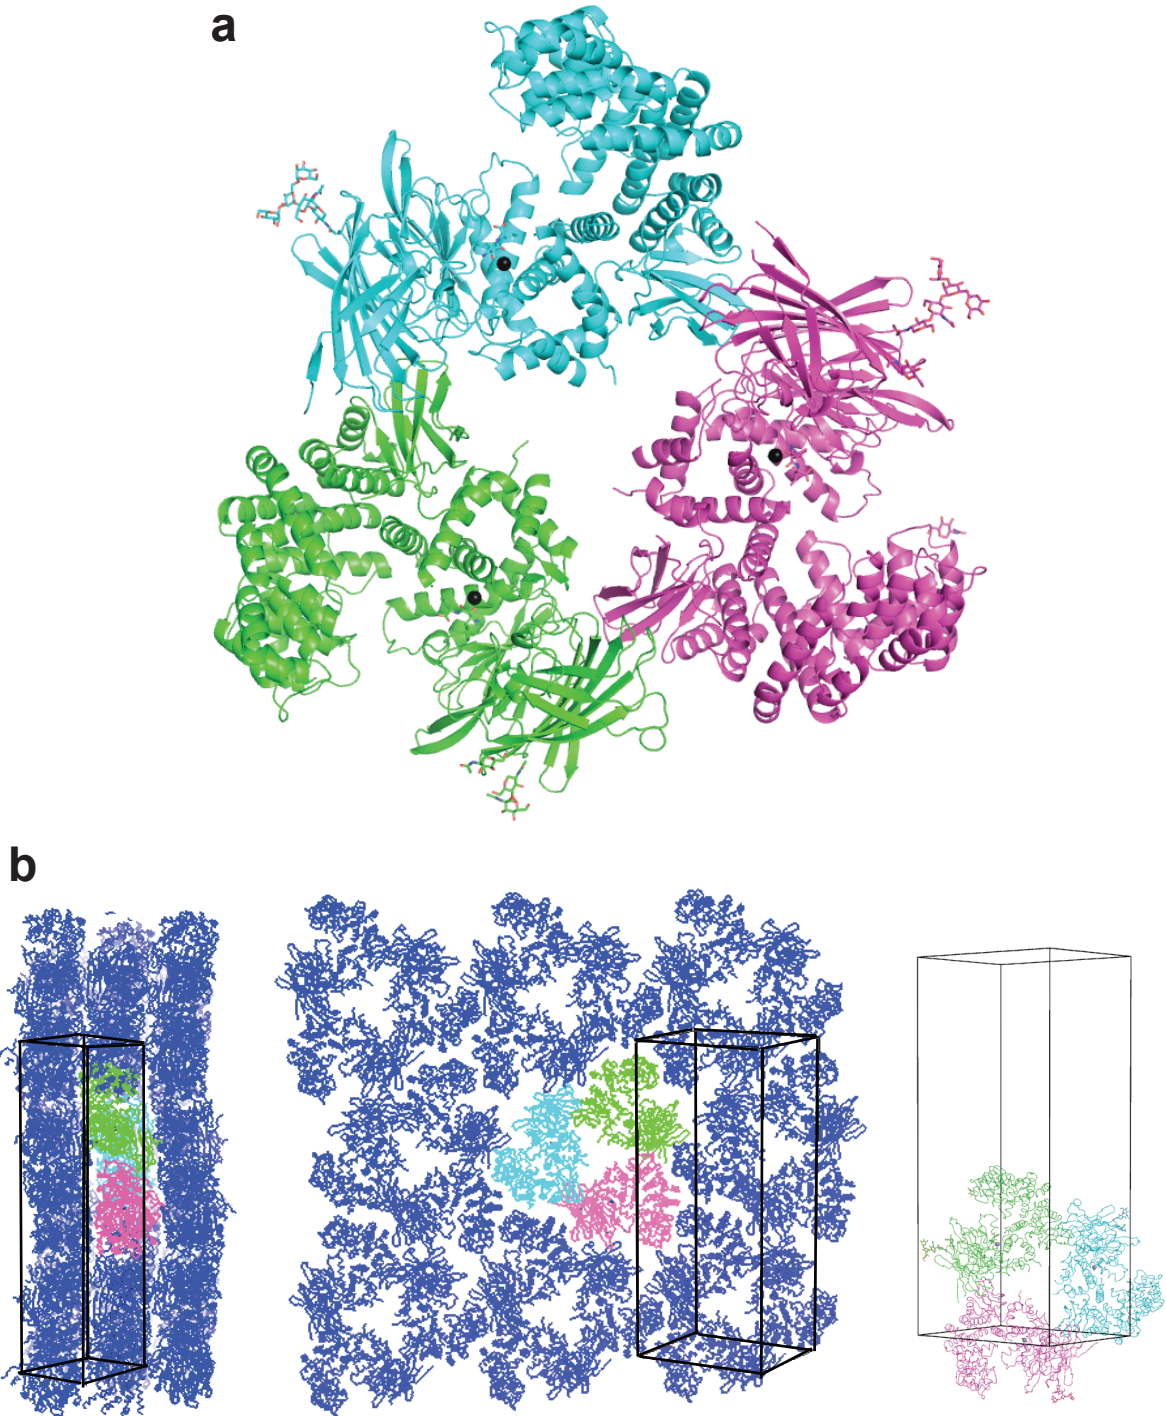

**Supplementary Figure 1** ERAP1 trimer and packing in unit cell

**(a)** Ribbon representation of an asymmetric unit showing trimeric arrangement of the crystallographically distinct molecules. ERAP1 main chain is represented in ribbon, the zinc atoms are shown as black spheres, and N-linked sugars and bestatin are shown in stick representation. **(b)** Orientation of ERAP1 trimer and packing in unit cell.

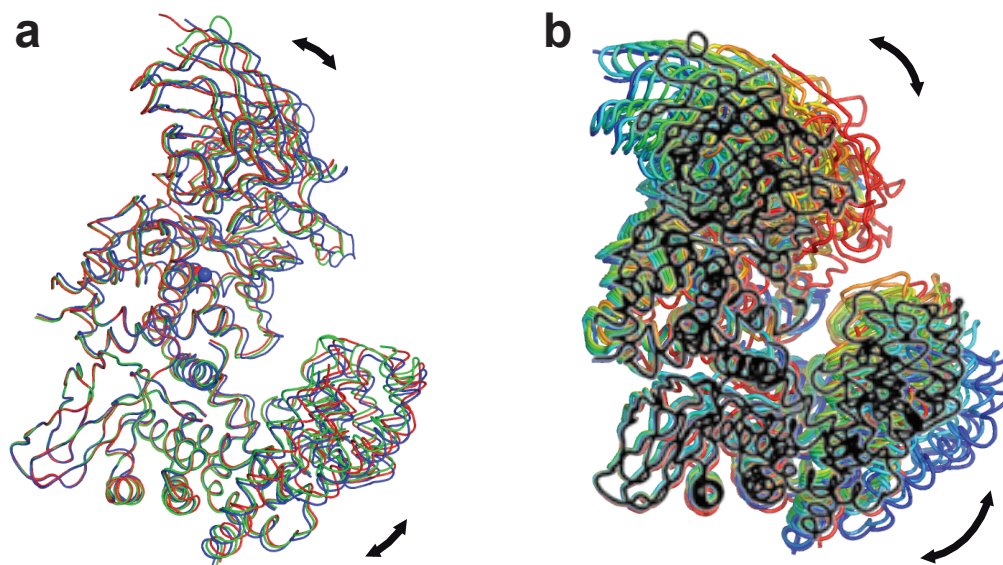

**Supplementary Figure 2 Domain Motions (a)** Hinge movement suggested by different inter-domain orientations among the three molecules observed in the ERAP1 crystallographic asymmetric unit, shown here as C-alpha traces aligned at domain III.

**(b)** Samples of ERAP1 motions as indicated by normal mode analysis, shown as C-alpha traces colored blue to red representing extremes of conformational alteration. The ERAP1 structure is overlaid in black.

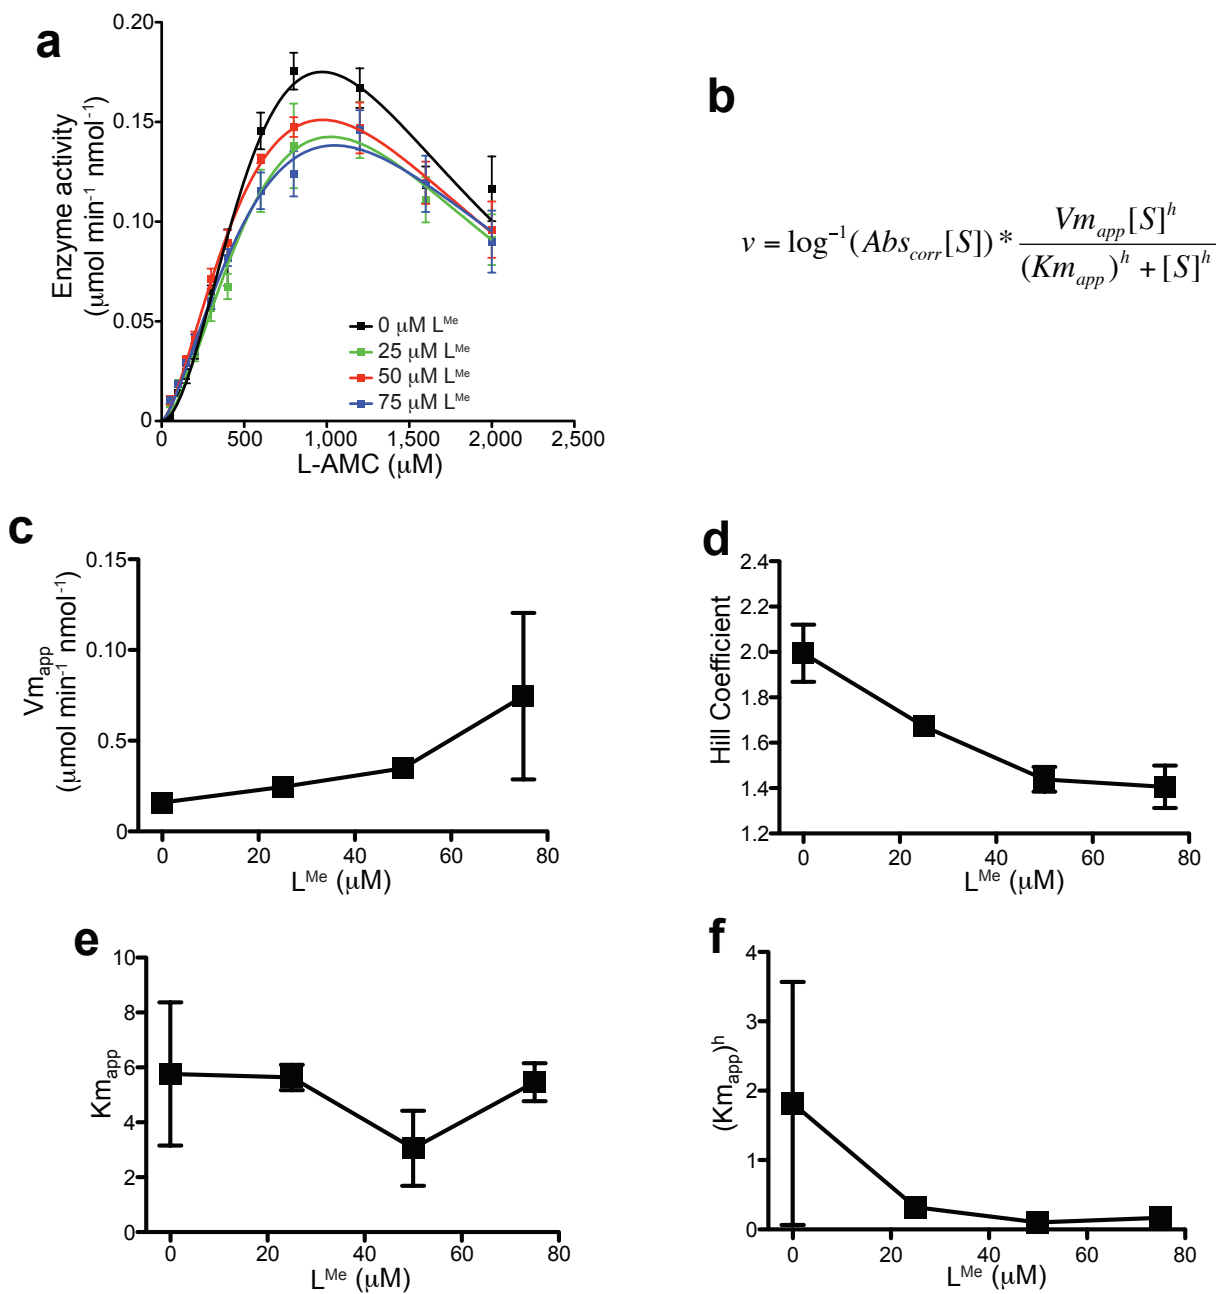

**Supplementary Figure 3** Kinetic parameters for  $L^{\text{Me}}$  activation of L-AMC hydrolysis by ERAP1. **(a)** Concentration dependence of initial rate of L-AMC hydrolysis by ERAP1 in the presence of various  $L^{\text{Me}}$  peptide concentrations. Lines show fits to allosteric activation equation shown in b. **(b)** Allosteric sigmoidal equation was used to fit initial rate vs. substrate concentrations profiles containing an inner filter correction term,  $\text{Abs}_{\text{corr}}$ . The kinetics parameters, **(c)** Apparent  $V_{m_{\text{app}}}$ , **(d)** Hill Coefficient, **(e)** Apparent  $K_{m_{\text{app}}}$ , and **(f)** Apparent  $(K_{m_{\text{app}}})^h$ , were extracted by fitting the curves in A using the allosteric sigmoidal equation in (b).

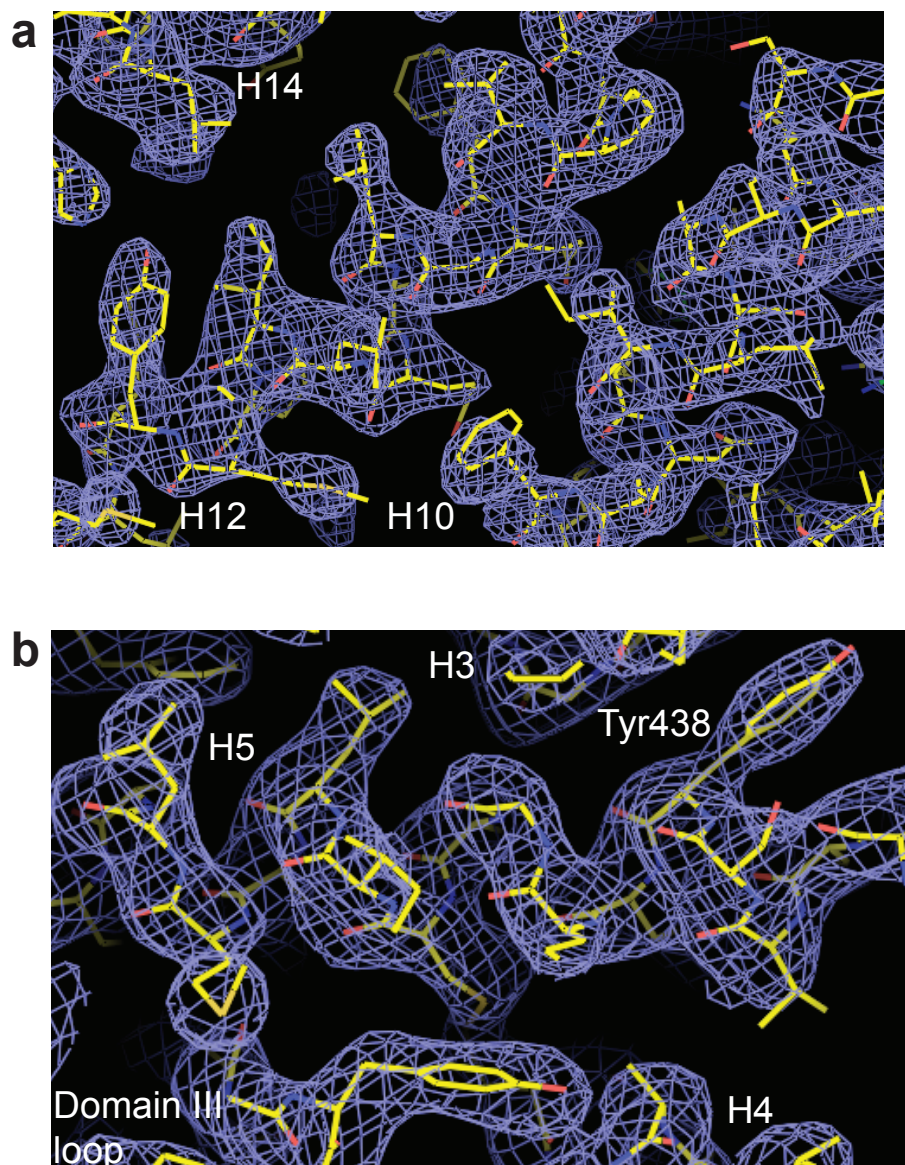

**Supplementary Figure 4** Electron Density. **(a)** Omit map showing portions of helices 10, 12, and 14 in domain IV. All atoms shown (residues 590–780) were omitted from map calculations. **(b)** Omit map showing Tyr438 on helix 5, helix 3, helix 4 in domain II and a loop from domain III. All atoms shown were omitted from map calculation. Blue mesh represents  $|2F_o - F_c|$  electron density, lines represent ERAP1 model.

### Supplementary Table 1 Non-crystallographic symmetry and domain statistics

---

#### B values ( $\text{\AA}^2$ )

|                       |                    |
|-----------------------|--------------------|
| Mol A / Mol B / Mol C | 62.8 / 63.5 / 63.4 |
| Domain 1 (1-254)      | 58.2               |
| Domain 2 (255-527)    | 52.3               |
| Domain 3 (528-613)    | 53.2               |
| Domain 4-n (614-750)  | 68.3               |
| Domain 4-c (751-941)  | 105.7              |

#### NCS RMSD ( $\text{\AA}$ )

|                       |                   |
|-----------------------|-------------------|
| Mol A / Mol B / Mol C | 0.006 / 0 / 0.006 |
| Domain 1 (1-254)      | 0.19              |
| Domain 2 (255-527)    | 0.14              |
| Domain 3 (528-613)    | 0.15              |
| Domain 4-n (614-750)  | 0.32              |
| Domain 4-c (751-941)  | 0.19              |

---
